# Supplementary material
Source: PubMed Central journal article supplement (PMC9771938)
Supplement: NIHMS1829596-supplement-supinfo.pdf [file NIHMS1829596-supplement-supinfo.pdf]

1 **Supplementary Table S1.** Thematic analysis of older adult VAS-related privacy concerns.

| Theme                                    | Example Statement(s)                                                                                                                                                                                                                                                                                                                                                                                                                                                                                                                                                                                                                                                                                                                                                                                                                                 |
|------------------------------------------|------------------------------------------------------------------------------------------------------------------------------------------------------------------------------------------------------------------------------------------------------------------------------------------------------------------------------------------------------------------------------------------------------------------------------------------------------------------------------------------------------------------------------------------------------------------------------------------------------------------------------------------------------------------------------------------------------------------------------------------------------------------------------------------------------------------------------------------------------|
| Listening-in<br>(n=4)                    | <ul style="list-style-type: none"> <li>• "...all with these listening devices never do turn off. The old privacy issue becomes-- some people aren't going to want Alexa on."</li> <li>• "Generally, no (Alexa). But I'd be a little careful about being aware who else is around."</li> <li>• "...people monitor to see how Alexa is doing, and they can hear stuff that you're saying."</li> <li>• "Well, I'm never going to have her dog sit again... I wonder if Alexa has been up to some trouble...have taken over."</li> </ul>                                                                                                                                                                                                                                                                                                                 |
| Tracking<br>(n=2)                        | <ul style="list-style-type: none"> <li>• "Well, somebody else could track what I'm doing."</li> <li>• "Have you run across anybody yet who thinks they're going to put a computer chip inside me so they can track me."</li> </ul>                                                                                                                                                                                                                                                                                                                                                                                                                                                                                                                                                                                                                   |
| Unwanted sharing of information<br>(n=5) | <ul style="list-style-type: none"> <li>• "I had the privacy concerns about having my responses to Alexa recorded and spliced together to enable someone to access my Schwab banking account."</li> <li>• "I don't trust it. I go into the Alexa app and erase history, even though I'm not doing anything even remotely wrong. I just don't like the idea of that Amazon is using the information to send the ads or something like that."</li> <li>• "Well, I probably wouldn't ask her to check my bank balance or anything."</li> <li>• "There were headlines about the kinds of information that Alexa relayed back to the mothership, and somewhat information was done with it at that point. I think that's my concern."</li> <li>• "No, we put a little piece of tape over her camera, so she can't see stuff unless we want to."</li> </ul> |

2

3

4 **Supplementary Table S2.** Semi-structured interview questions about Voice Assistant System Use.

|   | Questions                                                          |
|---|--------------------------------------------------------------------|
| 1 | Tell me about your experience in using the Amazon Alexa device?    |
| 2 | What kind of privacy concerns do you have?                         |
| 3 | How easy was it to use – why or why not?                           |
| 4 | What could be changed in terms of how you interact with the Alexa? |

5  
6  
7  
8  
9
